# Supplementary figures and images for: Macro-Scale Population Patterns in the Kofun Period of the Japanese Archipelago: Quantitative Analysis of a Larger Sample of Three-Dimensional Data from Ancient Human Crania
Source: MDPI journal article supplement (doi:10.3390/humans4020008), 2024-04-02

**ALL,  $r = 0.14$**

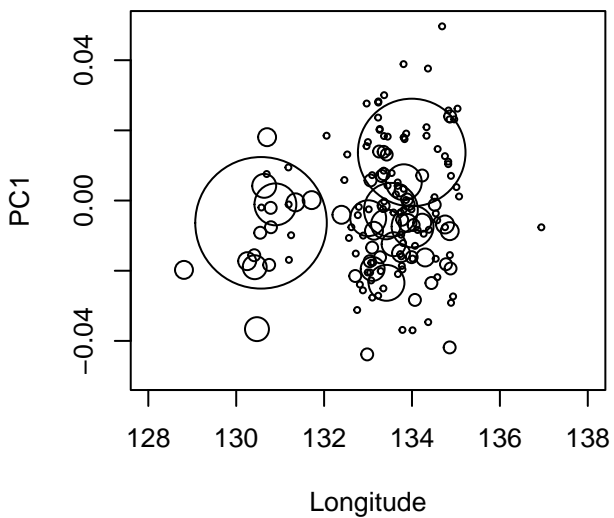

**Yayoi + Early,  $r = 0.237$**

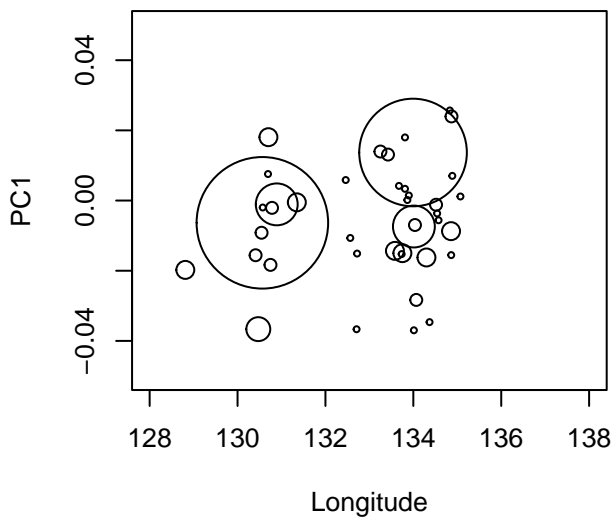

**Middle,  $r = -0.0229$**

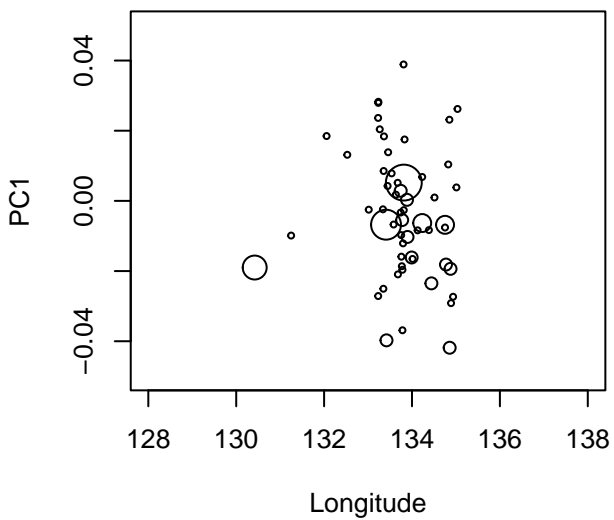

**Late,  $r = 0.147$**

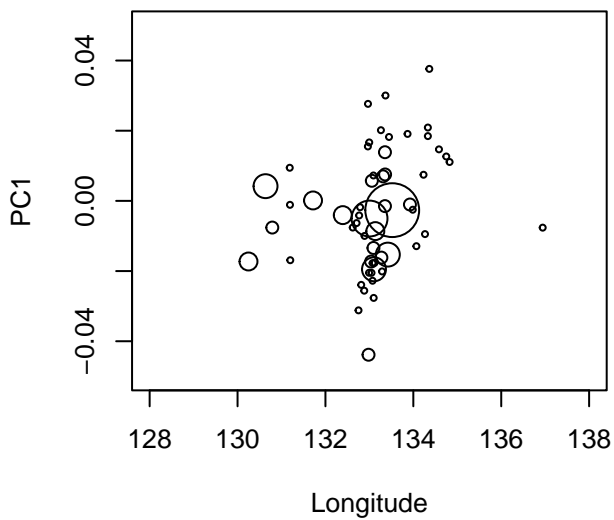

Supplement: s1 [file s1]

**Female**

**ALL,  $r = 0.41$**

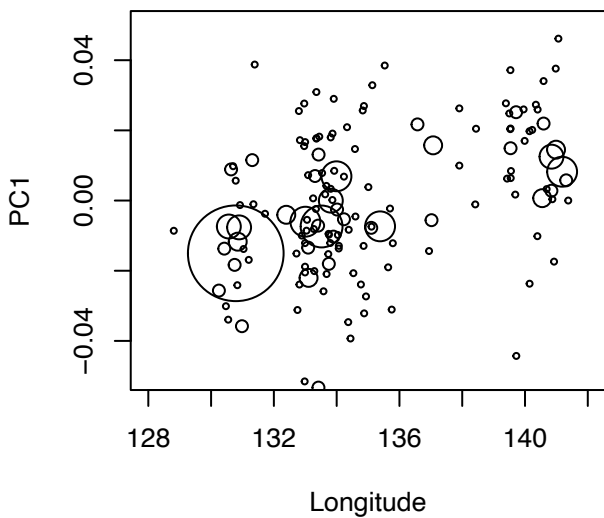

**Yayoi + Early,  $r = 0.37$**

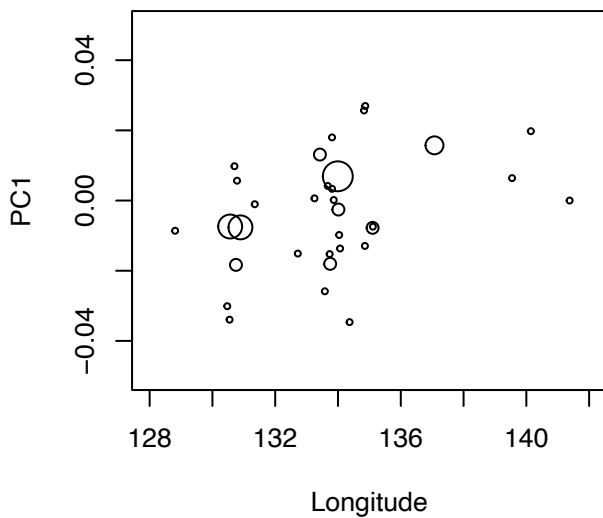

**Middle,  $r = 0.1$**

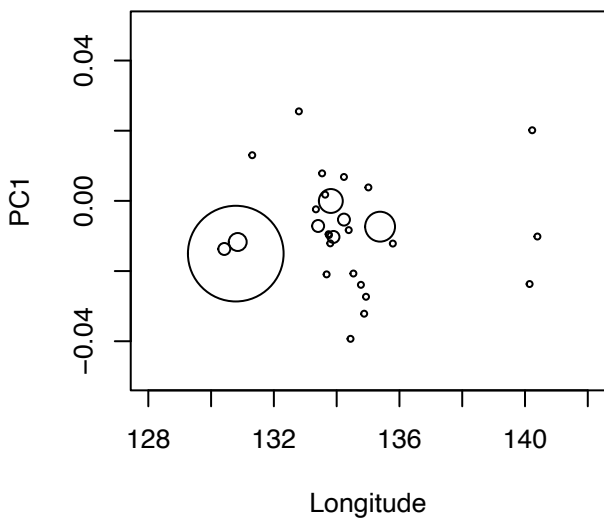

**Late,  $r = 0.423$**

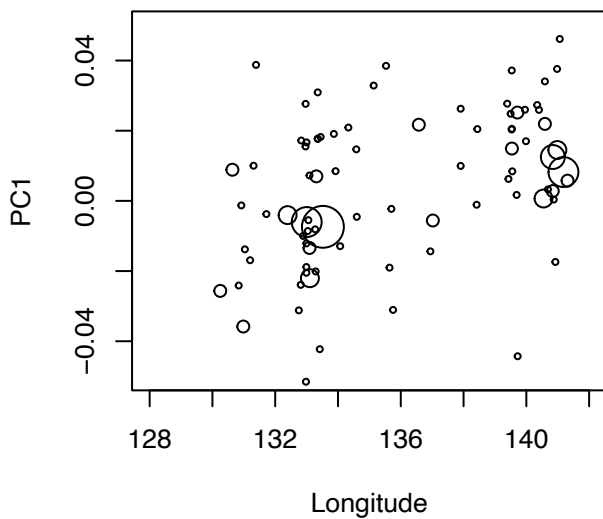

**Male**

**ALL,  $r = 0.377$**

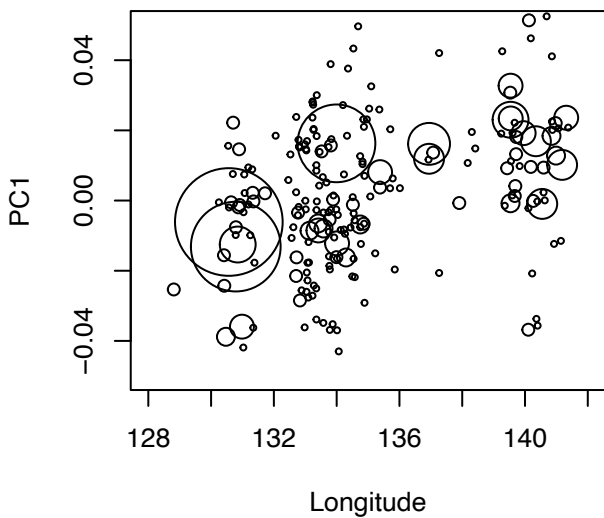

**Yayoi + Early,  $r = 0.365$**

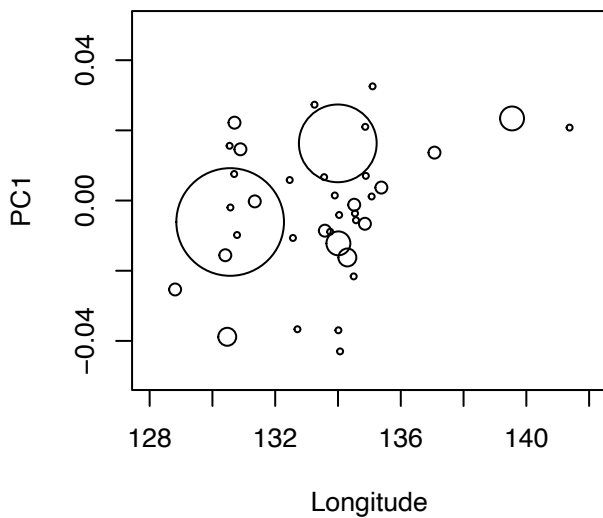

**Middle,  $r = 0.183$**

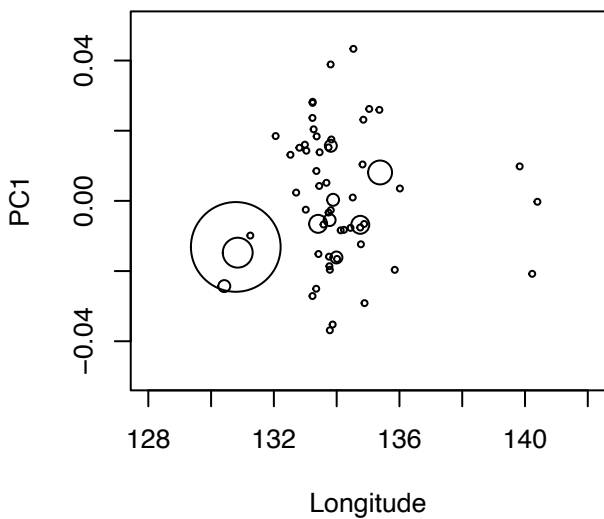

**Late,  $r = 0.409$**

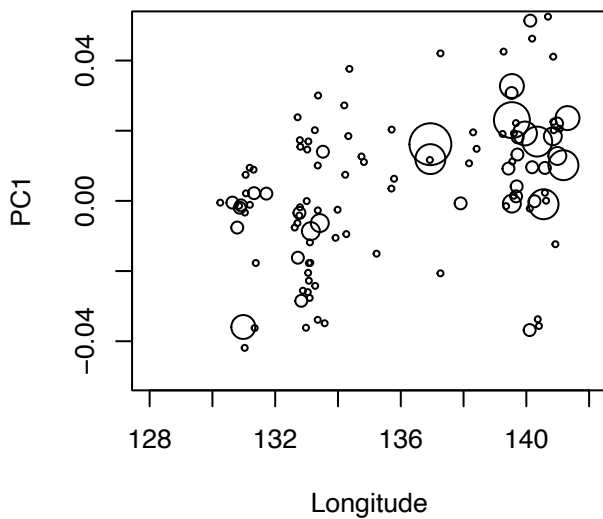

Supplement: s1 [file s1]
